# Supplementary material for: Effect of trachyte and basalt rock powders on maize (Zea mays L.) growth and yield on Fluvisols in Cameroon’s Sudano-Sahelian zone (Central Africa)
Source: Copernicus journal article supplement (doi:10.5194/egusphere-2025-3474), 2025-08-08
Supplement: Supplementary file [file egusphere-2025-3474-RC1-supplement.pdf]

| Line                              | Comment                                                                                                                                                                                                                                                                                                                                                                                                                                                                                                                                                                                                                                                                                                                                                                                                                   |
|-----------------------------------|---------------------------------------------------------------------------------------------------------------------------------------------------------------------------------------------------------------------------------------------------------------------------------------------------------------------------------------------------------------------------------------------------------------------------------------------------------------------------------------------------------------------------------------------------------------------------------------------------------------------------------------------------------------------------------------------------------------------------------------------------------------------------------------------------------------------------|
| L58                               | essential nutrients = redundant (plant nutrient = essential element)                                                                                                                                                                                                                                                                                                                                                                                                                                                                                                                                                                                                                                                                                                                                                      |
| L58                               | enhance its structure: neither of the cited references evaluated soil structure                                                                                                                                                                                                                                                                                                                                                                                                                                                                                                                                                                                                                                                                                                                                           |
| L96                               | essential nutrients                                                                                                                                                                                                                                                                                                                                                                                                                                                                                                                                                                                                                                                                                                                                                                                                       |
| 2.6<br>Pedoclimatic<br>Assessment | Not sure what is the purpose of this evaluation                                                                                                                                                                                                                                                                                                                                                                                                                                                                                                                                                                                                                                                                                                                                                                           |
| Table 4                           | There is a surplus line with Mg content after the total major element sum. Maybe the trace elements could be informed in a supplementary material, except maybe for those that are also micronutrients (Zn, Ni and Co).                                                                                                                                                                                                                                                                                                                                                                                                                                                                                                                                                                                                   |
| L274-275                          | Actually on Table 4                                                                                                                                                                                                                                                                                                                                                                                                                                                                                                                                                                                                                                                                                                                                                                                                       |
| L344                              | parent material instead of parent rock                                                                                                                                                                                                                                                                                                                                                                                                                                                                                                                                                                                                                                                                                                                                                                                    |
| L379-380                          | Not necessary, since this information was already provided in the methodology.                                                                                                                                                                                                                                                                                                                                                                                                                                                                                                                                                                                                                                                                                                                                            |
| L394                              | Actually on Table 10                                                                                                                                                                                                                                                                                                                                                                                                                                                                                                                                                                                                                                                                                                                                                                                                      |
| L430<br>Table 10                  | Please review how the standard deviation for yield was calculated, because the values for all treatments are the same, which is unlikely.                                                                                                                                                                                                                                                                                                                                                                                                                                                                                                                                                                                                                                                                                 |
| L524                              | basalts in larger font size                                                                                                                                                                                                                                                                                                                                                                                                                                                                                                                                                                                                                                                                                                                                                                                               |
| Conclusion                        | <p>Should provide short sentences that summarize the most important results, such as:</p> <p>The soils in Guiring are dominated by a high sand content (62-82%) and low clay (13-23%) and silt (5-15%) contents and mineralogically, these soils are composed of kaolinite, smectites, sepiolite, and quartz.</p> <p>The cation exchange capacity (18.7-25.0 cmolc kg<sup>-1</sup>) is high, while exchangeable bases (Ca<sup>2+</sup>, Mg<sup>2+</sup>, K<sup>+</sup>, Na<sup>+</sup>) and phosphorus are low to moderate, with base saturation varying between 23.6 and 42.4%.</p> <p>The study area has very favourable climatic conditions for maize growth (suitability index of 91.4), while the land suitability index is 62.4, classifying it as S2sf, indicating moderate suitability for maize cultivation.</p> |

|      |                                                                                                                                                                                                                                                                                                                                                                                                                                           |
|------|-------------------------------------------------------------------------------------------------------------------------------------------------------------------------------------------------------------------------------------------------------------------------------------------------------------------------------------------------------------------------------------------------------------------------------------------|
|      | <p>The control treatment (T0) showed the lowest yield, with 645.8 kg ha<sup>-1</sup>. Treatments T1 (2362.9 kg ha<sup>-1</sup>) and T2 (2763.9 kg ha<sup>-1</sup>) showed notable improvements with trachyte powder application. Treatments T3 (2558.6 kg ha<sup>-1</sup>) and T4 (2931.2 kg ha<sup>-1</sup>) highlighted the positive effect of basalt powder. Treatment T5 achieved the maximum yield of 3164.5 kg ha<sup>-1</sup>.</p> |
| L850 | Reference without publication year                                                                                                                                                                                                                                                                                                                                                                                                        |
